# Supplementary material for: Photochemistry of nitrate chemisorbed on various metal oxide surfaces
Source: Royal Society of Chemistry journal article supplement (doi:10.1039/c5cp02903a), 2015-01-01
Supplement: c5cp02903a1.pdf [file c5cp02903a1.pdf]

## Supporting materials for PCCP

# Photochemistry of Nitrate Chemisorbed on Various Metal Oxide Surfaces

Daniel M. B. Lesko,<sup>a</sup> Ellen M. Coddens,<sup>b</sup> Hannah D. Swomley,<sup>a</sup> Rachel M. Welch,<sup>b</sup> Jaya  
Borgatta,<sup>a</sup> and Juan G. Navea<sup>a,\*</sup>

<sup>a</sup>*Chemistry Department, Skidmore College, Saratoga Springs, NY, 12866-1632*

<sup>b</sup>*Chemistry Department, Lawrence University, Appleton, WI, 54911*

\* To whom correspondence should be addressed. Email: [jnavea@skidmore.edu](mailto:jnavea@skidmore.edu) (J. Navea)

## Product ratios on various metal oxide surfaces

In general, NO<sub>x</sub> is the primary product of the heterogeneous photolysis of HNO<sub>3</sub> on the metal oxide surfaces examined. Product ratios show that, for most surfaces, NO<sub>2</sub> is the major product early in the reaction and, along with NO, the major product of the entire heterogeneous photolysis. No quantifiable HONO was observed on SiO<sub>2</sub>.

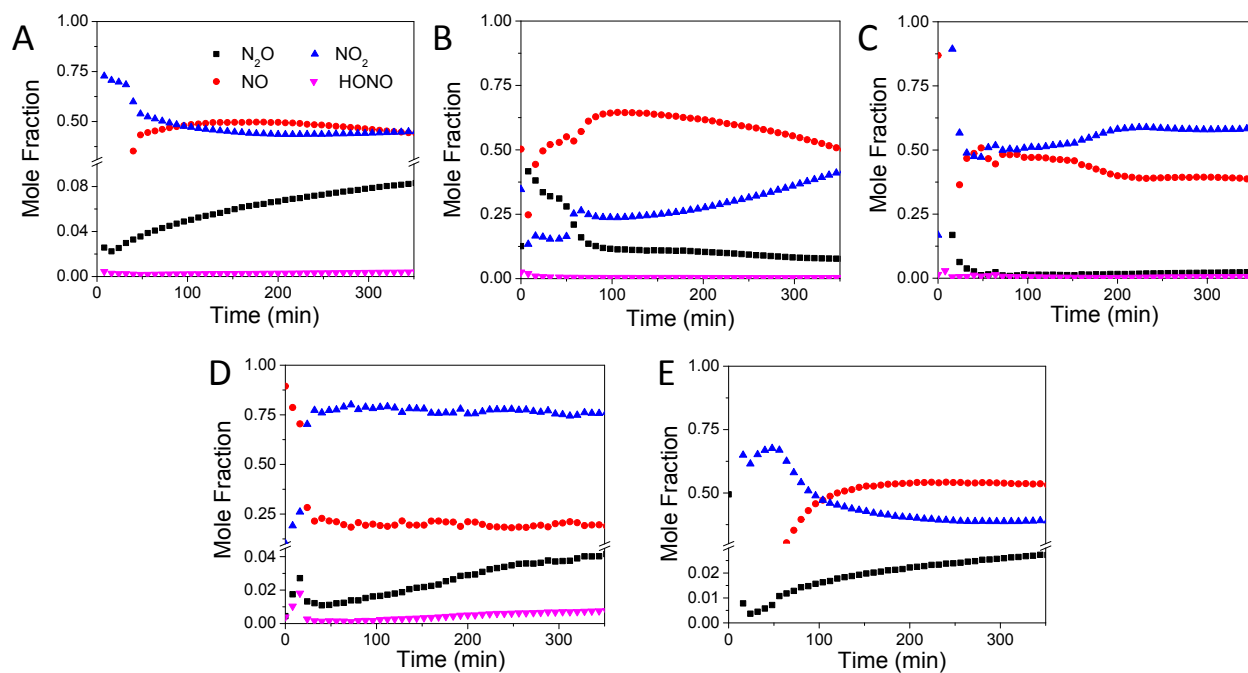

**Figure S1.** Mole fractions for gas products produced from the heterogeneous photolysis of chemisorbed nitrate on (A) TiO<sub>2</sub>, (B) ZnO, (C) Fe<sub>2</sub>O<sub>3</sub>, (D) Al<sub>2</sub>O<sub>3</sub>, and (E) SiO<sub>2</sub>. For clarity, only 16% of the data are plotted.
